# Supplementary material for: Conservation prioritization can resolve the flagship species conundrum
Source: PubMed Central journal article supplement (PMC7040008; doi:10.1038/s41467-020-14554-z), 2020-02-24
Supplement: 41467_2020_14554_MOESM6_ESM.pdf [file 41467_2020_14554_MOESM6_ESM.pdf]

Source Code for

## **Conservation prioritization can resolve the flagship species conundrum**

J. McGowan<sup>1,2,3\*</sup>, L. J. Beaumont<sup>1</sup>, R. J. Smith<sup>4</sup>, A. L. M. Chauvenet<sup>2,5</sup>, R. Harcourt<sup>1</sup>, S. Atkinson<sup>2</sup>, J. C. Mittermeier<sup>6</sup>, M. Esperon-Rodriguez<sup>1,7</sup>, J. B. Baumgartner<sup>1,8</sup>, A. Beattie<sup>1</sup>, R. Y. Dudaniec<sup>1</sup>, R. Grenyer<sup>6</sup>, D. A. Nipperess<sup>1</sup>, A. Stow<sup>1</sup>, and H. P. Possingham<sup>2,3</sup>

1. Department of Biological Sciences, Macquarie University, NSW, 2109, Australia.
2. Centre for Biodiversity and Conservation Science, University of Queensland, QLD, 4072, Australia
3. The Nature Conservancy, Arlington, VA, USA
4. Durrell Institute of Conservation and Ecology, School of Anthropology and Conservation, University of Kent, Canterbury, Kent CT2 7NR, UK
5. Environmental Futures Research Institute & School of Environment and Science, Griffith University, QLD, 4222, Australia.
6. School of Geography and Environment, Oxford University, South Parks Road, Oxford, OX1 3QY, UK.
7. Hawkesbury Institute for the Environment, Western Sydney University, 2753 NSW Australia
8. Centre of Excellence for Biosecurity Risk Analysis (CEBRA), School of BioSciences, University of Melbourne, Parkville, Victoria, Australia

Corresponding author: Jennifer McGowan, The Nature Conservancy, Arlington, Virginia, USA; email: [jennifer.mcgowan@tnc.org](mailto:jennifer.mcgowan@tnc.org)

*R programming source code*

## Code for Integrated Analysis

## Written by A. Chauvenet and J. McGowan

The following code assumes you have two matrices organized by the binary presence of species (rows) in each unique site or planning unit (columns, or “PUID” in code). For our analysis, these matrices are coded as “Bactot\_m” and “Candtot\_m”, which relates to the Background species and Candidate flagship matrices, respectively.

The PU\_layer contains attributes that are desirable for breaking ties. You can refer to Supplementary Figure 1 for the schematic of the algorithm below.

##Start here by reading in data

```
PU<-read.csv('PU_Layer.csv',header=T)
```

```
Candtot_m<-read.csv("candidatematrix.csv",row=1)
```

```
Bactot_m<-read.csv("backgroundmatrix.csv",row=1)
```

```
master_back<-Bactot_m #makes duplicate backup
```

```
master_cand<-Candtot_m #makes duplicate backup
```

##### Below is the integrated algorithm from Supplementary Figure 1.

```
SAVED <- c() ## store the name of the Candidate species selected
```

```
SAVED_count <- c()
```

```
SAVED2 <-
```

```
  c() ##Number of unique new candidates species selected in the Max step (including 0 if no  
  new species)
```

```
PUIDs <- c() ## the puid of the Max
```

```
BACK <- c() ## the total number of Background save in each puid
```

```
ECO_rem_rec <-
```

```
  c() ## the Number of puids removed with each ecoregions
```

```
Bactot_m <- master_back # reloads to start fresh each time
```

```
Candtot_m <- master_cand
```

```
count <- 0 # counting the steps and selection of PUIDS
```

```
while (dim(Bactot_m)[1] > 0 &&
```

```
  dim(Bactot_m)[2] > 0)
```

```
  # condition to keep loop running until nothing left
```

```
{
```

```
  count <- count + 1
```

```
  #1/ find PUID which maximises the number of background species (and candidate species if  
  there is a tie)
```

```
  max_sum <-
```

```
    apply(Bactot_m, 2, sum) #sums over each column in the matrix
```

```
  len1 <-ifelse(length(max_sum)<100,1,round(1 * length(max_sum) / 100,0))
```

```
  #grabs the top 1 percent with max species
```

```
  max_N <- sort(max_sum, decreasing = TRUE)[1:len1]
```

```
  max_pos <-
```

```

    order(max_sum, decreasing = T)
# position in Bacttot_m that has the largest # of background species
temp <- c()
for (j in 1:len1) {
  pos2 <-
    which(colnames(Candtot_m) == names(max_sum[max_pos])[j])
##finds the corresponding Number of candidates in the top 1% that is selected
  temp <- c(temp, sum(Candtot_m[, pos2]))
}
#breaking ties between candidate sites
temp_max_pos <- which(temp == max(temp))
temp_max <- temp[temp_max_pos]
if (length(temp_max) > 1)
  temp_max_pos <-
    temp_max_pos[which(max_N[temp_max_pos] == max(max_N[temp_max_pos]))]
# if tie, pick the site with the max background species
# above line is where one can assign how to break ties with different attributes, or
# species in this section
(max_N[temp_max] == max(max_N[temp_max])
if (length(temp_max_pos) > 1)
  temp_max_pos <-
    sample(temp_max_pos, 1)

# if the max background tie is another tie, break tie at random

back_puid_max <- max_N[temp_max_pos] #collect and store the selected site
max_pos <-
  which(colnames(Bacttot_m) == names(max_N)[temp_max_pos]) # find the position
max_puid <-
  colnames(Bacttot_m)[max_pos] #find the unique id of selected site

##The following section deals with complementarity by removing the selected site,
#removing its associated ecoregion, and removing all associated species from the background
#species matrix and storing the candidates that have been selected

# storing candidates
cand_pos <- which(colnames(Candtot_m) == max_puid)
saved_pos <- which(Candtot_m[, cand_pos] == 1)
SAVED <-
  c(SAVED, rownames(Candtot_m)[saved_pos]) # storing the candidates from the selected
#site
diff <- length(SAVED) - length(unique(SAVED))
# if duplicates, find them and only store unique candidates in this list
SAVED <- unique(SAVED)
SAVED2 <- c(SAVED2, length(saved_pos) - diff)
SAVED_count <- c(SAVED_count, rep(count, (length(saved_pos) - diff)))
print(c("count", count))
print(c("unique number of candidate saved", sum(SAVED2)))
PUIDs <- c(PUIDs, max_puid)

```

```

if (SAVED2[length(SAVED2)] > 0) {
  # removing the site puid after selection from Background matrix

print(c("dim backtot 0", dim(Backtot_m)))
  BACK <- c(BACK, sum(Backtot_m[, max_pos]))
  saved_back <- which(Backtot_m[, max_pos] == 1)
  Backtot_m <- Backtot_m[, -max_pos]
  print(c("dim backtot 1 (rem col)", dim(Backtot_m)))
  if (length(saved_back) > 0)
    Backtot_m <- Backtot_m[-saved_back, ]
  print(c("dim backtot 2 (rem rows)", dim(Backtot_m)))
  ECO_rem_rec <- c(ECO_rem_rec, length(max_pos))

  # removing the associated puids with the ecoregion that has been selected
  ECO_rem <- PUS$G200_ID[which(PUS$puid == PUIDs[length(PUIDs)])]
  puid_rem <-
    PUS$puid[which(PUS$G200_ID == ECO_rem)] # all the PUIDs belonging to that
#ecoregion
  temp_puid <- c()
  for (k in 1:length(puid_rem)) {
    temp_puid <- c(temp_puid, which(colnames(Backtot_m) == puid_rem[k]))
  }
  ECO_rem_rec <- c(ECO_rem_rec, length(temp_puid))
  if (length(temp_puid) > 0)
    Backtot_m <- Backtot_m[, -temp_puid]
  print(c("dim backtot 3 (rem col)", dim(Backtot_m)))
} else{
  Backtot_m <- Backtot_m[, -max_pos]
  BACK <- c(BACK, 0)
  ECO_rem_rec <- c(ECO_rem_rec, 0)
}
}

#Below helps link stored lists and writes the output files
cbind(SAVED,SAVED_count)

Puids<-as.data.frame(PUIDs)
Back<-as.data.frame(BACK)
Pus<-cbind(Puids,Back)
Pus$search_no<-seq.int(nrow(Pus))
Cands<-cbind(SAVED,SAVED_count)
colnames(Cands)[2]<-"search_no"

Base_result<-merge(Cands,Pus, by="search_no") #final output
write.csv(Base_result,"Base_results_TH.csv",row.names=T)
#End Code

```
